# Supplementary material for: Mode of Action of Neonicotinoid Insecticides Imidacloprid and Thiacloprid to the Cockroach Pameα7 Nicotinic Acetylcholine Receptor
Source: MDPI journal article supplement (doi:10.3390/ijms22189880), 2021-09-13
Supplement: s1 [file s1]

# Supplementary Materials

## Mode of action of neonicotinoid insecticides imidacloprid and thiacloprid to the cockroach Pame $\alpha$ 7 nicotinic acetylcholine receptor

Alison Cartereau, Emiliane Taillebois, Jean-Yves Le Questel and Steeve H. Thany

**Table S1.** Selected interatomic distances, docking scores (DS) and glide energies (GE) (kcal mol<sup>-1</sup>) of IMI and THI binding in cockroach Pame $\alpha$ 7 nAChR (CD subunits interface).

| Neonicotinoid                                                                                  | Interaction                                                       | Interaction distance (Å) | DS   | GE    |
|------------------------------------------------------------------------------------------------|-------------------------------------------------------------------|--------------------------|------|-------|
| 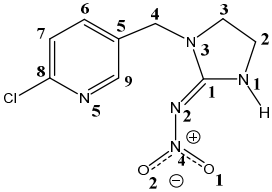 <p>IMI</p> | N5...H(O) (W248)                                                  | 2.01                     |      |       |
|                                                                                                | W248 O...HN(Val159 C) <sup>MC</sup>                               | 2.13                     |      |       |
|                                                                                                | W248(O)H...OC(Asn147 C) <sup>MC</sup>                             | 2.11                     |      |       |
|                                                                                                | Ctr <sub>1</sub> <sup>a</sup> ...Ctr(5) (Trp 189 D) <sup>SC</sup> | 5.24                     |      |       |
|                                                                                                | C9H... Ctr(5) (Trp 189 D) <sup>SC</sup>                           | 3.01                     |      |       |
|                                                                                                | C4H...S (Cys 233 D) <sup>SC</sup>                                 | 2.64                     | -7.2 | -75.1 |
|                                                                                                | Ctr <sub>2</sub> <sup>b</sup> ...Ctr(6) (Trp 189 D) <sup>SC</sup> | 4.10                     |      |       |
|                                                                                                | C3H... Ctr(6) (Trp 189 D) <sup>SC</sup>                           | 2.34                     |      |       |
|                                                                                                | Ctr <sub>2</sub> <sup>b</sup> ...Ctr(6) (Tyr 231 D) <sup>SC</sup> | 3.80                     |      |       |
|                                                                                                | C3H... Ctr(6) (Tyr 231 D) <sup>SC</sup>                           | 2.79                     |      |       |
|  <p>THI</p> | N4...H(O) (W248)                                                  | 1.99                     |      |       |
|                                                                                                | W248 O...HN(Val159 C) <sup>MC</sup>                               | 2.13                     |      |       |
|                                                                                                | W248(O)H...OC(Asn147 C) <sup>MC</sup>                             | 2.11                     |      |       |
|                                                                                                | Ctr <sub>1</sub> <sup>a</sup> ...Ctr(5) (Trp 189 D) <sup>SC</sup> | 5.18                     |      |       |
|                                                                                                | C10H... Ctr(5) (Trp 189 D) <sup>SC</sup>                          | 3.00                     |      |       |
|                                                                                                | C5H...S (Cys 233 D) <sup>SC</sup>                                 | 2.67                     | -4.6 | -71.7 |

|                                                                   |      |
|-------------------------------------------------------------------|------|
| Ctr <sub>2</sub> <sup>b</sup> ...Ctr(6) (Trp 189 D) <sup>SC</sup> | 4.12 |
| C2H... Ctr(6) (Trp 189 D) <sup>SC</sup>                           | 2.93 |
| C3H... Ctr(6) (Trp 189 D) <sup>SC</sup>                           | 2.88 |
| Ctr <sub>2</sub> <sup>b</sup> ...Ctr(6) (Tyr 231 D) <sup>SC</sup> | 3.89 |
| C3H... Ctr(6) (Tyr 231 D) <sup>SC</sup>                           | 2.36 |

---

<sup>a</sup>Ctr1 : centroid of the pyridinic ring of IMI and THI; Ctr2: centroid of the five membered saturated ring of IMI and THI; Ctr(6) correspond to the centroid of the six or six membered ring of the indole lateral chain of Trp or of the phenole ring of Tyr whereas Ctr refers to the centroid of the five membered of Trp; <sup>MC</sup> main chain of the residue; <sup>SC</sup> sidechain of the residue.
